# Supplementary material for: Deposition of ionic species and black carbon to the Arctic snow pack: Combining snow pit observations with modeling
Source: Copernicus journal article supplement (doi:10.5194/acp-2019-215), 2019-03-26
Supplement: Supplementary file 1 [file acp-2019-215-supplement.pdf]

## Supplement

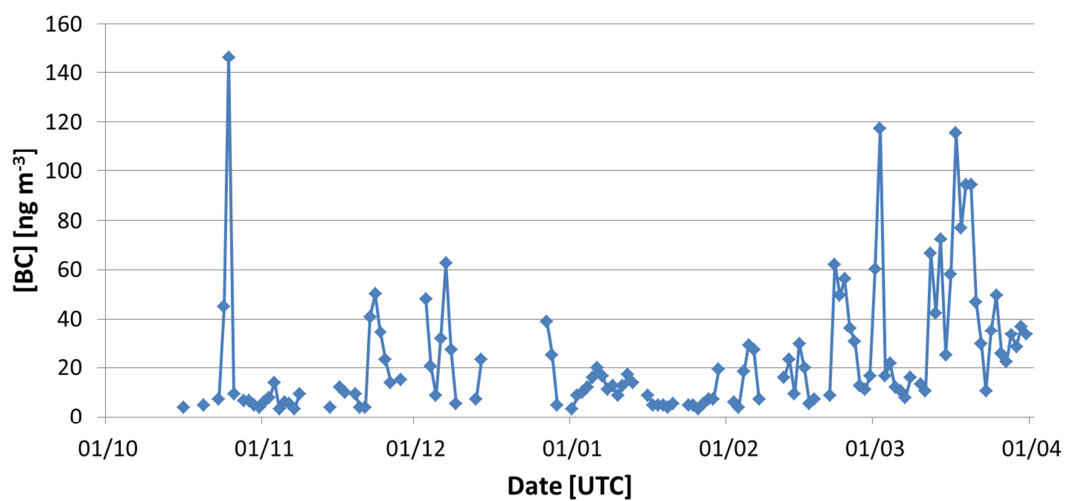

Fig. S1: Time series of atmospheric eBC measured at Zeppelin station from October 2011 to April 2012.

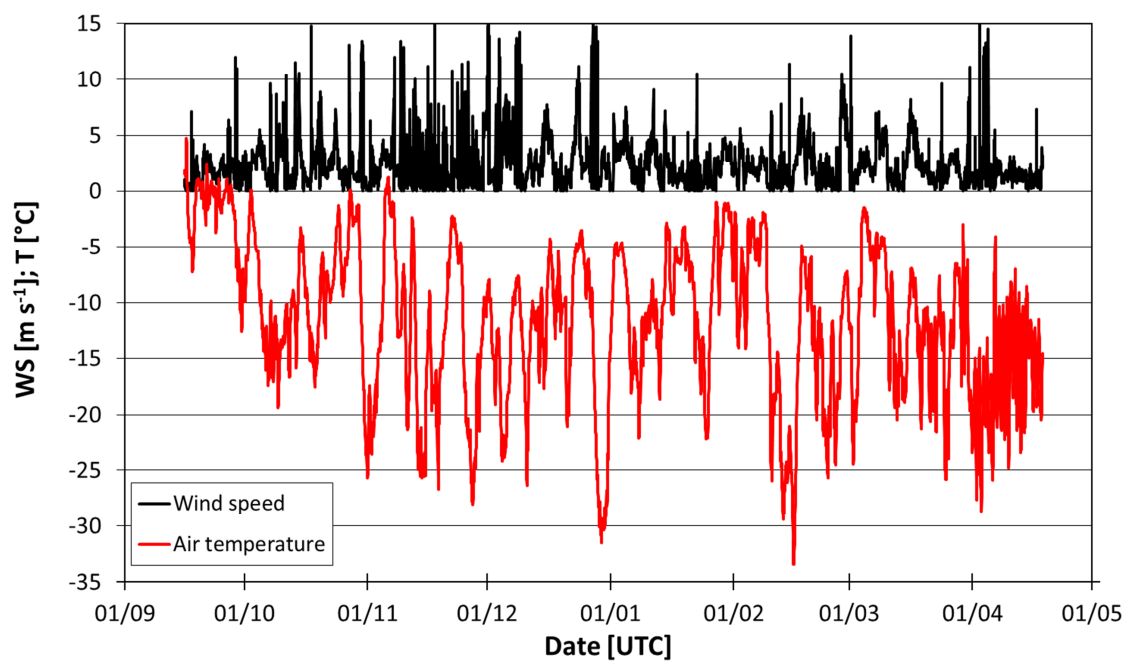

Fig. S2: Time series of temperature and wind speed measured at the KV automatic weather station 8 from September 2011 to April 2012.

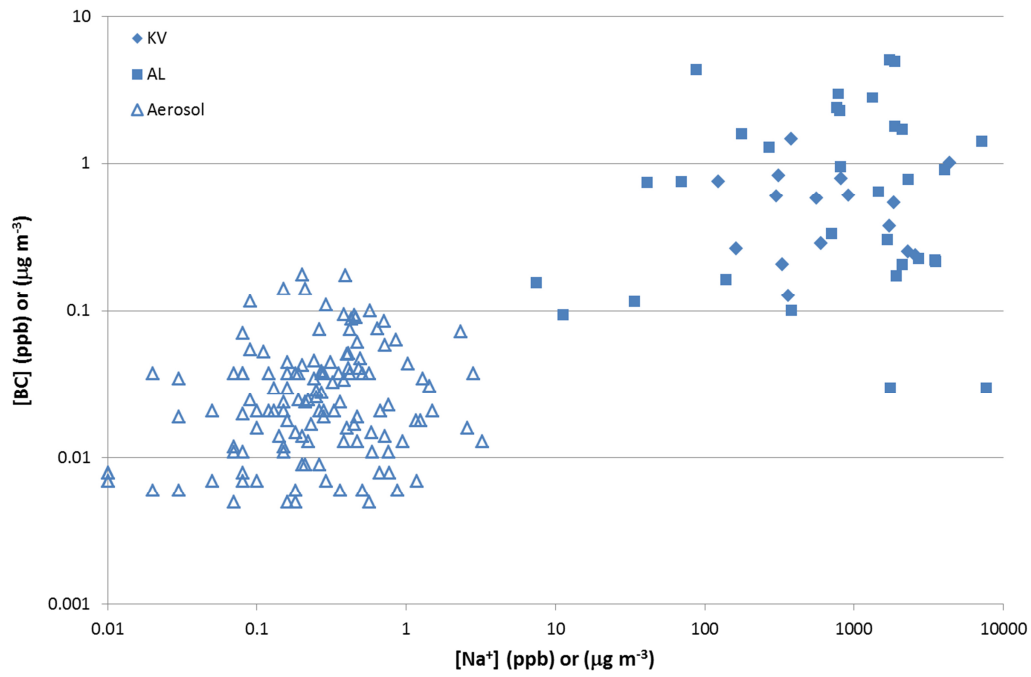

**Fig. S3: BC vs. sodium concentrations in snow pit KV (filled diamonds) and AL (filled squares), and in aerosols (open triangles). BC in the snow pits corresponds to rBC, while the BC in aerosols corresponds to eBC.**
